1 **TIN2 functions with TPP1/POT1 to stimulate telomerase processivity**

2

3 Alexandra M. Pike<sup>a,b\*</sup>, Margaret A. Strong<sup>a</sup>, John Paul T. Ouyang<sup>a,c</sup>, Carla J. Connelly<sup>a</sup>,  
4 Carol W. Greider<sup>a,b,c,#</sup>

5

6 <sup>a</sup> Department of Molecular Biology and Genetics, Johns Hopkins University School of  
7 Medicine, Baltimore, Maryland, USA

8 <sup>b</sup> Graduate Program in Cellular and Molecular Medicine, Johns Hopkins University  
9 School of Medicine, Baltimore, Maryland, USA

10 <sup>c</sup> Graduate Program in Biochemistry Cell and Molecular Biology, Johns Hopkins  
11 University School of Medicine, Baltimore, Maryland, USA

12

13 <sup>#</sup> Address correspondence to Carol W. Greider, [cgreider@jhmi.edu](mailto:cgreider@jhmi.edu)

14 <sup>\*</sup> Present Address: Alexandra M. Pike, MIT Department of Biology, Cambridge,  
15 Massachusetts

16

17 Running Title

18 TIN2 stimulates telomerase processivity

19

20 Word Count: Text - 4620; Materials and Methods – 1685

21 Keywords:

22 Telomerase; telomere; TIN2; telomere syndromes; alternative splicing; shelterin; TPP1;  
23 POT1; processivity

## 24 **Abstract**

25           Telomere length maintenance is crucial for cells that divide many times. TIN2 is  
26 an important regulator of telomere length, and mutations in *TINF2*, the gene encoding  
27 TIN2, cause short telomere syndromes. While the genetics underscore the importance of  
28 TIN2, the mechanism through which TIN2 regulates telomere length remains unclear.  
29 Here, we characterize the effects of TIN2 on telomerase activity. We identified a new  
30 isoform in human cells, TIN2M, that is expressed at similar levels to previously studied  
31 TIN2 isoforms. Additionally, we found that all three TIN2 isoforms stimulated  
32 telomerase processivity beyond the previously characterized stimulation by TPP1/POT1.  
33 Mutations in the TPP1 TEL-patch abrogated this stimulation, implicating TIN2 as a  
34 component of the TPP1/POT1 processivity complex. All three TIN2 isoforms localized to  
35 telomeres *in vivo* but had distinct effects on telomere length, suggesting they are  
36 functionally distinct. These data contrast previous descriptions of TIN2 a simple  
37 scaffolding protein, showing that TIN2 isoforms directly regulate telomerase.

## 38 **Importance**

39           Telomere length regulation maintains the fine balance between cancer and short  
40 telomere syndromes, which are complex degenerative diseases including bone marrow  
41 failure and pulmonary fibrosis. The enzyme telomerase maintains telomere equilibrium  
42 through highly regulated addition of telomere sequence to chromosome ends. Here, we  
43 uncover a previously unknown biochemical role for human shelterin component TIN2 in  
44 regulating telomerase enzyme processivity and suggest that TIN2 functions with

45 TPP1/POT1 as a specialized telomeric single-stranded DNA-binding complex.  
46 Additionally, CRISPR/Cas9 genome editing revealed a new TIN2 isoform expressed in  
47 human cells, and we showed that the three TIN2 isoforms have different effects on  
48 telomere length. These findings suggest that previous descriptions of TIN2 as a tethering  
49 or bridging protein is incomplete and reveal a previously unappreciated complexity in  
50 telomere length regulation. This new perspective on shelterin components regulating  
51 telomere length at the molecular level will help advance understanding of clinical  
52 manifestations of short telomere syndromes.  
53

## 54 **Introduction**

55           Telomere length in human cells is maintained around a tight equilibrium that  
56 prevents life-threatening disease. Telomere shortening leads to a characteristic set of  
57 degenerative diseases, including pulmonary fibrosis, bone marrow failure, and immune  
58 deficiency, collectively called short telomere syndromes(1). In contrast, 90% of human  
59 cancers upregulate telomerase, and mutations that increase telomerase levels predispose  
60 to cancer(2–4). While we understand many component pathways that regulate telomere  
61 length, a detailed integrated mechanism of telomere length regulation is not fully  
62 understood.

63           Human telomeres consist of about 10kb of TTAGGG repeats, that are mostly  
64 double-stranded DNA with a single-stranded 3' overhang, all bound by a protein complex  
65 termed shelterin(5). This DNA-protein complex protects chromosome ends, and shelterin  
66 both positively and negatively regulates telomere repeat addition by telomerase. The  
67 shelterin complex consists of six subunits: two double-stranded DNA binding proteins  
68 TRF1 and TRF2(6–9), a single-stranded telomeric binding protein POT1(10, 11), as well  
69 as interacting proteins TPP1, TIN2, and RAP1(12–16).

70           POT1 and TPP1 form a heterodimer that binds single stranded telomeric DNA  
71 and stimulates telomerase processivity *in vivo* and *in vitro*(17–19). This stimulation is  
72 mediated though the TPP1 OB-fold, which contains conserved TEL-patch and NOB  
73 regions that directly interact with the TEN domain of TERT(20–23). Mutations in the  
74 TEL-patch abrogate the stimulation of processivity, and compensatory charge swap

75 mutations in TERT restore function(24), suggesting the direct binding of TPP1/POT1  
76 heterodimer to TERT mediates processivity.

77 TIN2, encoded by the *TINF2* gene, localizes to telomeres through interactions  
78 with TRF1, TRF2, and TPP1 (Figure 1A, B). TIN2 interaction with TPP1 is essential for  
79 TPP1/POT1 localization and function in cells(25–28). TIN2 also binds to the double  
80 stranded DNA binding proteins TRF1 and TRF2(12, 29). Knocking down TIN2 also  
81 causes loss of TRF1 and TRF2 at telomeres, suggesting that TIN2 stabilizes TRF1 and  
82 TRF2 binding to telomeres(29). Because of its interactions with TRF1, TRF2, and  
83 TPP1/POT1, TIN2 has been described as a molecular bridge between the dsDNA- and  
84 ssDNA-binding shelterin components. However, it is likely that TIN2 performs  
85 additional telomeric functions, as shelterin may consist of distinct functional  
86 subcomplexes as implied by genetic and biochemical experiments(29–33).

87 *TINF2* mutations cause autosomal dominant inheritance of short telomere  
88 syndromes, including dyskeratosis congenita(34, 35) and pulmonary fibrosis(36–38).  
89 These mutations are often *de novo*, causing severe disease in patients heterozygous for  
90 the mutant allele. These germline missense or nonsense mutations in TIN2 are clustered  
91 in a small domain of unknown function (Figure 1B)(34, 35, 39). Within this domain,  
92 K280 and R282 are the most commonly mutated residues, and K280E, K280X, R282S,  
93 and R282H are the most widely studied TIN2 mutations. These mutant proteins are  
94 expressed and stable. In addition to TIN2, mutations in TPP1 and POT1 also cause short  
95 telomere disease. The TPP1- $\Delta$ K170 mutation deforms the TEN domain binding interface  
96 and disrupts the TPP1-telomerase interaction, leading to decreased telomerase

97 processivity(40–42). A POT1-S322L mutation in Coats plus is thought to cause short  
98 telomeres through defective telomere replication(43). While mutations in many different  
99 genes cause telomere shortening in patients(3), TIN2, TPP1, and POT1 are the only  
100 shelterin proteins with mutations identified in short telomere syndromes to date.

101         Several mechanisms have been proposed for telomere shortening caused by  
102 *TINF2* mutations, including defects in telomerase recruitment(44) or decreased  
103 telomerase association with the telomere(45). Others have argued for telomerase-  
104 independent mechanisms of telomere shortening(46, 47). Several lines of evidence  
105 suggest that the TIN2 patient mutations function in a dominant negative manner(34, 37,  
106 45), however, the molecular nature of this effect is not yet understood. To elucidate the  
107 mechanism of telomere shortening, we set out to test the biochemical functions of the  
108 TIN2 isoforms. We identified a new isoform, TIN2M, and found that all three TIN2  
109 isoforms stimulate telomerase processivity in a TPP1/POT1 dependent manner. The  
110 three isoforms had different effects on telomere length when overexpressed in human  
111 cells, suggesting functional differences *in vivo*.

## 112 **Results**

### 113 **Identification of a new TIN2 isoform, TIN2M**

114         Human TIN2 is alternatively spliced into two previously described isoforms,  
115 TIN2S and TIN2L(12, 48). Most prior work has been performed using the shorter human  
116 TIN2S, which was described first, or in the mouse TIN2, which only has one isoform.

117 TIN2L encompasses all 354 amino acids of TIN2S with an additional 97 C-terminal  
118 amino acid residues(48), including a highly conserved domain (Figure 1B)(49). To study  
119 TIN2 function *in vivo*, we knocked in an N-terminal myc epitope tag at the endogenous  
120 *TINF2* locus in 293T cells using CRISPR/Cas9 genome editing (Supplementary Figure  
121 1A).

122 Western blots on several edited clones unexpectedly showed three distinct bands,  
123 instead of the expected two bands of the known isoforms (Supplementary Figure 1B). To  
124 further examine these isoforms, we cloned a myc-tagged full-length *TINF2* gene,  
125 including all introns, into an expression vector with the CMV promoter. In transfected  
126 cells overexpressing this construct alongside TIN2S or TIN2L cDNA, we again observed  
127 an intermediate sized band at approximately 47 kDa. (Figure 1C).

128 To test whether this band corresponds to an alternatively spliced TIN2 isoform,  
129 we used a modified 3' RACE with PacBio sequencing to identify all full-length  
130 expressed isoforms in human and mouse cells. In 293T cells, TIN2S and TIN2L cDNAs  
131 were identified along with a third major isoform, which would encode the expected  
132 molecular weight for the unknown protein. We termed this isoform TIN2M for TIN2  
133 “medium”. TIN2M results from retention of the last intron, between exons 8 and 9, that  
134 encodes 13 amino acids of unique sequence (<sub>408</sub>-VSGKEQKAGKGDG<sub>-420</sub>) before  
135 reaching a stop codon (Figure 1D-E). Sequence read counts indicated that TIN2M and  
136 TIN2L mRNAs were expressed at similar levels, while TIN2S had 2-fold greater  
137 representation than each of the others, suggesting it is the predominant transcript (Figure  
138 1D and Supplementary Figure 2A). 3' RACE further showed that TIN2M was present at

139 similar levels in four other human cell lines (HeLa, K562, RPE-1, and a newly derived  
140 LCL) (Figure 1E). In addition to these three major isoforms in human cells, we identified  
141 a number of additional recurrent exon skipping, intron retention, and alternative  
142 polyadenylation site usage events, including exon 2 skipping described previously(50)  
143 (Supplementary Figure 2A). We found that two different mouse strains (C57BL/6 and  
144 CAST/EiJ) expressed just one TIN2 isoform that is most similar to TIN2L, as previously  
145 described(48, 51) (Supplementary Figure 2B).

146 Evidence for expression of TIN2M was also found in publicly available data from  
147 PacBio IsoSeq of MCF-7 breast cancer cells ([http://www.pacb.com/blog/data-release-](http://www.pacb.com/blog/data-release-human-mcf-7-transcriptome/)  
148 [human-mcf-7-transcriptome/](http://www.pacb.com/blog/data-release-human-mcf-7-transcriptome/)). Additionally, genome-wide ribosome profiling data from  
149 GWIPS-viz shows ribosome peaks present in the unique coding region of the TIN2M  
150 retained intron(52). TIN2M and TIN2L, but not TIN2S, contain the recently identified  
151 CK2 phosphorylation site(49). All three of the expressed isoforms contain the  
152 documented cluster of telomere syndrome patient mutations and the other known  
153 interaction domains, suggesting that any of these three isoforms could mediate the short  
154 telomere phenotypes seen *in vivo*.

155

### 156 **TIN2 cooperates with TPP1/POT1 to stimulate telomerase processivity**

157 TIN2 interacts directly with TPP1, a processivity factor that heterodimerizes with  
158 POT1 and directly binds telomerase through the TPP1 TEL-patch domain(18, 20–22, 53).  
159 To examine whether TIN2 affects telomerase activity or processivity, we adapted the



160 cell-based system overexpressing TERT, TR, POT1, and TPP1 used by Nandakumar *et al*  
161 (20). By co-overexpressing TERT, TR, TPP1, and POT1 in cells, cell lysates can be used  
162 in direct telomerase activity assays(18–20, 54). Because endogenous telomere proteins  
163 are expressed at low levels, the telomerase activity observed in this system result from  
164 the overexpressed proteins. We adapted this system to generate cells constitutively  
165 expressing TERT, TR, TPP1, and POT1, where TIN2 can be introduced by transient  
166 transfection.

167 For reproducible overexpression of the protein components, we created a  
168 polycistronic expression cassette containing FLAG-TPP1, FLAG-POT1, and FLAG-  
169 TERT separated by 2A peptides (Figure 2A and Supplementary Figure 3A). As a  
170 negative control, we mutated the TPP1 TEL-patch (TPP1 E169A/E171A)(20), referred to  
171 here as TPP1<sup>TEL</sup>, to test whether any effects of TIN2 are mediated through TPP1/POT1  
172 stimulation of telomerase (Figure 2A and Supplementary Figure 3B). Then, we generated  
173 a clonal cell line overexpressing TR in 293TREx FLP-in cells, into which we integrated  
174 the respective expression cassette at a unique genomic locus using the FLP-in system.  
175 The resulting cell lines are referred to as TPP1/POT1/TERT and TPP1<sup>TEL</sup>/POT1/TERT  
176 (Figure 2A-C).

177 To examine the interaction of TIN2 with TPP1/POT1 and telomerase, the three  
178 TIN2 isoforms were individually transfected into each cell line. Each of the three TIN2  
179 isoforms reproducibly co-immunoprecipitated with TPP1/POT1 and TERT in reciprocal  
180 pull downs of either myc-TIN2 or FLAG-TPP1/POT1/TERT (Figure 2D and  
181 Supplementary Figure 4). We observed no change in co-immunoprecipitation of

182 TPP1/POT1 and TERT with TIN2 when any of the three isoforms carried one of the  
183 common patient mutations, K280E (Figure 2D), as previously reported for the TIN2S  
184 isoform(44, 55). Telomerase activity can be detected in these co-immunoprecipitations,  
185 suggesting that the telomerase in complex with TIN2 is active (data not shown). We  
186 conclude that all three isoforms of TIN2 are interacting with TPP1/POT1 in complex  
187 with active telomerase, and the K280E patient mutation does not disrupt this interaction.

188 To examine the effects of TIN2 on telomerase activity, we transfected the myc-  
189 tagged full length gene, myc-*TINF2*, into the TPP1/POT1/TERT cell line. All three  
190 isoforms were expressed from the myc-*TINF2* construct and the lysates showed an  
191 increase in processivity compared to the GFP control (Supplementary Figure 5),  
192 suggesting that TIN2 enhances telomerase processivity over the effects of TPP1/POT1  
193 alone. To determine if specific TIN2 isoforms are required for this stimulation, we  
194 independently transfected each isoform into the TPP1/POT1/TERT cell line (Figure 3A).  
195 We found a reproducible 10-20% stimulation of telomerase processivity with each of the  
196 three N-terminally tagged isoforms (Figure 3B-C). To test whether TIN2 stimulation of  
197 telomerase depends on TPP1/POT1, we transfected TIN2 into TPP1<sup>TEL</sup>/POT1/TERT cells  
198 and separately into a TERT-only cell line overexpressing TERT/TR but not TPP1/POT1.  
199 We found no stimulation of telomerase processivity in either of these cell lines (Figure  
200 3A-C and Supplementary Figure 6), suggesting the stimulation is dependent on  
201 TPP1/POT1. Our results indicate that TIN2 cooperates with TPP1/POT1 to stimulate  
202 telomerase processivity.

203           Because all three TIN2 isoforms stimulated telomerase to the same extent in a  
204    TPP1/POT1 dependent manner, we tested whether patient mutations TIN2-K280E, TIN2-  
205    R282S, TIN2-R282H, or TIN2-K280X affect processivity. In some instances, we found  
206    that TIN2 mutants were deficient at stimulating telomerase activity, but this result was  
207    variable both in whole-cell lysates and in TIN2 co-immunoprecipitations (Supplementary  
208    Figure 5 and data not shown). Because the mutants are dominant-negative *in vivo*, we  
209    tried co-expressing wild-type TIN2 with a mutant TIN2, but there was no change in  
210    processivity stimulation in this setting (Supplementary Figure 7). Although the patient  
211    mutations did not reproducibly affect telomerase processivity, we have identified a  
212    previously unknown role of TIN2 isoforms in telomerase processivity stimulation that  
213    changes the understanding of TIN2's role in telomere length regulation.

214

### 215    **TIN2 isoforms localize to telomeres and have different effects on telomere length**

216           Since all TIN2 isoforms stimulated telomerase in a TPP1/POT1 dependent  
217    manner, we examined whether they function differently in human cells. TIN2S and  
218    TIN2L have been demonstrated to localize to telomeres *in vivo* through interaction with  
219    TRF1 and TRF2(12, 48). Patient mutations did not disrupt the localization of TIN2S(44),  
220    but localization of TIN2L with patient mutations has not been reported. To determine  
221    whether TIN2M localizes to telomeres and whether patient mutations affect localization  
222    of TIN2M or TIN2L, we examined the localization of each isoform with or without the  
223    K280E patient mutation.

224           Because of the alternative splicing of *TINF2* transcripts, we could not test  
225 expression of individual isoforms at the endogenous locus. Instead, we stably  
226 overexpressed cDNA encoding TIN2S, TIN2M, or TIN2L with or without the K280E  
227 patient mutation in HeLa-FRT Flp-in cells (Figure 4A). Using this system, the expression  
228 constructs were integrated at a unique genomic locus, and isogenic, polyclonal cell lines  
229 were selected. Western blot analysis showed similar expression levels of TIN2S, TIN2M,  
230 and TIN2L that was not affected by the K280E mutation (Figure 4A). Using indirect  
231 immunofluorescence, we found that all three isoforms, with or without the K280E patient  
232 mutation, showed discrete foci that co-localized with TRF2, indicating that they each  
233 localize to telomeres *in vivo* (Figure 4B).

234           Previous work has shown that overexpression of wild-type TIN2S had little effect  
235 on telomere length, while overexpression of TIN2S-K280E, TIN2S-R282S, or TIN2S-  
236 R282H decreased telomere length(12, 44). A recent study showed overexpression of  
237 TIN2L resulted in some increase in telomere length(49). Having these isoform-specific  
238 polyclonal TIN2 overexpressing cell lines in hand, we examined how the TIN2 constructs  
239 affect telomere length. We passaged these cells and monitored telomere length by  
240 Southern blot and q-FISH analysis. TIN2S, TIN2S-K280E, and the control GFP cell lines  
241 showed no significant changes in telomere length over time (Figure 4C-D). In contrast,  
242 TIN2L showed some telomere elongation, and TIN2M, TIN2M-K280E, and TIN2L-  
243 K280E showed significant increases in telomere length (Figure 4C-D). The excessive  
244 telomere elongation resembles the telomere elongation in a number of TPP1/POT1 loss  
245 of function mutants(12, 13, 31, 44, 56). These telomere length changes are not due to

246 clonal variation, as our cells are a mixed clonal population of isogenic cells. Telomere  
247 length effects appear to differ between immortalized cell lines, as TIN2 overexpression  
248 had little effect on telomere length in 293TREx cells (data not shown). The observation  
249 that the different TIN2 isoforms and mutants do have strong yet different effects in HeLa  
250 cells suggests that these isoforms play different functional roles in the cell.

251 We next examined telomere aberrations in blinded q-FISH images. We saw no  
252 changes in signal-free ends, PQ ratios, sister telomere heterogeneity, or telomere fusions  
253 (Supplementary Figure 8). However, we found a variable but elevated incidence of  
254 telomere doublets, or fragile telomeres, which are indicative of telomere replication  
255 defects, in cells overexpressing TIN2M and the mutant isoforms TIN2S-K280E, TIN2M-  
256 K280E, and TIN2L-K280E (Supplementary Figure 8A). These results support the  
257 conclusion that the telomere elongation is due to an effect of TIN2 on TPP1/POT1  
258 function and further suggest that TIN2 participates with TPP1 and POT1 in facilitating  
259 telomere replication as well as stimulating telomerase processivity.

## 260 **Discussion**

261 We have identified a new isoform of TIN2, TIN2M, and have shown that each of  
262 the three TIN2 isoforms cooperate with TPP1/POT1 to stimulate telomerase processivity.  
263 We found that the TIN2 isoforms play different roles in telomere length regulation in  
264 cells. Our data suggest that TIN2 forms a functional shelterin subcomplex with TPP1/  
265 POT1. Considering TIN2 as part of the telomerase processivity complex provides a new  
266 way to think about its role in telomere length regulation.

267           The mutations in *TINF2* in short telomere syndrome patients mostly cluster in a  
268 TIN2 domain of unknown function in exon 6 near the C-terminus of TIN2(34, 35).  
269 Genetic evidence strongly supports a dominant negative mechanism for the mutant TIN2  
270 proteins. First, TIN2 mutations have autosomal dominant inheritance. The mutant  
271 proteins are stably expressed and cause telomere shortening despite the presence of a  
272 wild-type TIN2. Secondly, the clustering of disease associated alleles rather than  
273 distribution across the coding sequence suggests these are not simply inactivating  
274 mutations but rather a gain of function. Finally, there is evidence for selection against the  
275 mutant proteins in the hematopoietic lineage *in vivo*(37). The dominant negative  
276 mechanism is also supported by experimental evidence(45), but the molecular nature of  
277 this effect is not well understood.

#### 278 **TIN2 C-terminus plays an essential role in telomere length regulation**

279           We found that all three TIN2 isoforms form a complex with TPP1/POT1,  
280 stimulate telomerase processivity, and localize to telomeres, yet have different effects on  
281 telomere length in cells, underscoring the important role of the TIN2 C-terminus. TIN2  
282 can be divided into two regions: the shelterin-interacting region in the N-terminus, and  
283 the C-terminal region that includes the patient mutation cluster, the variable C-terminal  
284 extensions of TIN2M and TIN2L, and several other interaction sites and  
285 modifications(47, 49, 57, 58) (Figure 1B). All three isoforms contain the shelterin-  
286 interacting domain and patient mutation cluster, varying only in the C-terminal extension  
287 after E354.

288           The structure is known for much of the shelterin-interacting region, including the  
289 N-terminal TRF2/TPP1 binding domain (TIN2<sub>1-202</sub>)(59) and the short TRF1-interacting  
290 motif (TIN2<sub>256-276</sub>)(60). There is no structural information, however, for the C-terminal  
291 region, including both the mutation hotspot and the variable C-terminal extension, which  
292 contains a highly conserved region with a CK2 phosphorylation site at S396(49).  
293 Interestingly, some of the patient mutations are truncations, such as K280X, that generate  
294 a short stable protein missing the entire C-terminal region(39). Previous work indicated  
295 the importance of the TIN2 C-terminal region, including the high degree of conservation  
296 the variable C-terminal extension and the dominant effects of C-terminal truncating  
297 mutations. Our work further supports this idea, with discovery of a TIN2 isoform with an  
298 alternative C-terminal region and evidence that overexpression of only the isoforms  
299 containing C-terminal extensions strongly affect telomere length (Figure 4C,D and (49)).  
300 The TIN2 C-terminus may function through binding a novel partner, or through a  
301 conformational or structural role.

### 302 **TIN2 cooperates with TPP1/POT1 to stimulate telomerase processivity**

303           Our studies indicate that TIN2 is part of the telomerase processivity factor (Figure  
304 5A). All three TIN2 isoforms formed a stable complex with TPP1/POT1 and TERT and  
305 further stimulated telomerase processivity over that of TPP1/POT1 alone. This  
306 stimulation of processivity required TPP1 and POT1, as there was no stimulation in cells  
307 expressing TPP1 TEL-patch mutants or TERT alone (Figure 3 and Supplementary Figure  
308 6). TIN2 could enhance telomerase processivity by improving the TPP1/POT1 complex

309 stability or its interaction with telomerase, or by promoting the telomeric ssDNA  
310 interaction of the complex, or some combination of these (Figure 5A).

311         Interestingly, the identification of TIN2 as an additional component to an already  
312 known processivity factor is reminiscent of recent findings in *Tetrahymena*. The  
313 *Tetrahymena* telomerase holoenzyme structure(61) revealed previously unknown  
314 subunits, Teb2 and Teb3, that interact with the previously defined Teb1-p50 processivity  
315 complex. The addition of these proteins to *in vitro* reactions further stimulated telomerase  
316 processivity, possibly by stabilizing the complete, assembled, processive enzyme  
317 complex(62). Further, this structure revealed that the telomerase holoenzyme contains  
318 two single-stranded DNA binding complexes: the p50/TEB processivity factor, which  
319 stimulates telomeric G-strand synthesis by telomerase, and the CST complex, which  
320 stimulates telomeric C-strand synthesis by lagging strand replication machinery. This is  
321 the first evidence of physical coupling of two telomere maintenance processes that have  
322 long been known to be coupled *in vivo* (reviewed in(63)).

323         Our results with TIN2 parallel the discovery of the missing components of the  
324 TEB processivity complex in *Tetrahymena*(61, 62), suggesting that TIN2 binding to  
325 TPP1/POT1 stabilizes the complex and thus promotes processivity. Interestingly, CST  
326 (CTC1/STN1/TEN1), a second ssDNA telomeric complex, interacts with TPP1/POT1 to  
327 limit telomere extension by coupling C-strand to G-strand synthesis(64, 65). The C-  
328 terminal region of TIN2 is a candidate for coupling TIN2/TPP1/POT1 with CST for  
329 coordinated C- and G-strand synthesis, affecting both positive and negative telomere  
330 length regulation. Decreased telomerase activity leads to gradual telomere shortening



331 over many generations. Partial uncoupling of telomerase elongation from C-strand  
332 synthesis, however, could cause unrestrained telomerase elongation of telomeres, while  
333 complete uncoupling could result in telomere shortening by failure to synthesize either C-  
334 or G-strands.

335 **TIN2/TPP1/POT1 is a telomere specific single-stranded binding complex involved in**  
336 **telomere extension and replication**

337 Our data, in combination with previously published work, suggest that TIN2/TPP1/POT1  
338 is a shelterin subcomplex. TIN2 not only increases the processivity stimulation of the  
339 complex but also promotes its telomeric localization *in vivo* (Figure 5A). Evidence from  
340 previous work supports this conclusion. First, when TRF1 is removed from telomeres by  
341 tankyrase-1 modification, TIN2/TPP1 remain at telomeres (13). Second, posttranslational  
342 depletion of TIN2 by Siah2 ubiquitination removes TPP1 but not TRF1 or TRF2 from  
343 telomeres(57). Further evidence in TIN2 floxed mouse cell lines or TIN2 knockdown in  
344 HeLa cells show reduced telomeric TPP1/POT1 localization(26, 27). Similarly,  
345 disruption of the TIN2 TRF1-binding motif does not disrupt TRF1, TRF2, or Rap1  
346 localization, but prevents TIN2/TPP1/POT1 accumulation at telomeres in mouse  
347 cells(25). Deletion of the TPP1-binding region from mouse TIN2 also prevents  
348 localization of TPP1/POT1 to telomeres(28). Finally, genetic evidence using CRISPR  
349 knockouts in human cells led the authors to conclude that TIN2/TPP1/POT1 is a shelterin  
350 subcomplex(30). These findings together with our work showing the stimulation of

351 telomerase processivity, further supports the conclusion that TIN2, TPP1, and POT1  
352 function together as a subcomplex of shelterin.

353         The TIN2/TPP1/POT1 heterotrimer likely affects both telomerase and replication  
354 fork progression. Considering TIN2/TPP1/POT1 as a telomere specific ssDNA binding  
355 (SSB) protein complex helps explain defects in telomere replication that have been  
356 reported for both POT1 and TPP1 knockdowns and mutants(12, 13, 31, 44, 56). While  
357 most diagrams draw TPP1/POT1 bound to the G-strand overhang at telomeres, this  
358 telomere specific SSB complex can also bind the telomeric G-strand exposed during  
359 DNA replication(26, 66) (Figure 5B).

360         TPP1 and POT1 have both been reported to facilitate DNA replication through  
361 telomeric tracts(64, 67–69). POT1 mutants that cannot bind DNA cause telomere  
362 replication fork stalling, fragile telomeres, and ATR activation(69), possibly due to  
363 ssDNA exposure at the telomeric replication fork. TIN2 knockdown(26) and mouse  
364 mutants(46) also cause an ATR-mediated DNA damage response. We found that  
365 overexpression of some of the TIN2 isoforms resulted in fragile telomeres indicative of  
366 telomere replication defects (Figure S8). Taken together, this suggests that the telomeric  
367 TIN2/TPP1/POT1 and CST complexes may participate directly in replication fork  
368 progression through the telomere, and that perturbation of this function may lead to  
369 replication fork collapse and activation of ATR.

370         The interpretation of TIN2/TPP1/POT1 as a ssDNA binding shelterin subcomplex  
371 provides an updated view of TIN2's role in telomere length regulation. We found that  
372 TIN2 is expressed as multiple isoforms that have different effects on telomere length in

373 human cells. Strikingly, we found that TIN2 is a previously unappreciated component of  
374 the telomerase processivity complex. All three isoforms stimulated telomerase  
375 processivity in a TPP1/POT1 dependent manner. Further biochemical work on this  
376 heterotrimeric ssDNA telomere binding protein will elucidate the mechanism of TIN2  
377 regulation of telomere length and how it is disrupted in short telomere syndromes.

## 378 **References**

- 379 1. Armanios M, Blackburn EH. 2012. The telomere syndromes. *Nat Rev Genet*  
380 13:693–704.
- 381 2. Kim NW, Piatyszek MA, Prowse KR, Harley CB, West D, Ho PLC, Coviello GM,  
382 Wright WE, Weinrich SL, Shay W, West MD, Shay JW. 1994. Specific  
383 Association of Human Telomerase Activity with Immortal Cells and Cancer.  
384 *Science* (80- ) 266:2011–2015.
- 385 3. Stanley SE, Armanios M. 2015. The short and long telomere syndromes: Paired  
386 paradigms for molecular medicine. *Curr Opin Genet Dev* 33:1–9.
- 387 4. Horn S, Figl A, Rachakonda PS, Fischer C, Sucker A, Gast A, Kadel S, Moll I,  
388 Nagore E, Hemminki K, Schadendorf D, Kumar R. 2013. TERT promoter  
389 mutations in familial and sporadic melanoma. *Science* 339:959–61.
- 390 5. Palm W, de Lange T. 2008. How Shelterin Protects Mammalian Telomeres. *Annu*  
391 *Rev Genet* 42:301–334.
- 392 6. Zhong Z, Shiue L, Kaplan S, de Lange T. 1992. A mammalian factor that binds  
393 telomeric TTAGGG repeats in vitro. *Mol Cell Biol* 12:4834–4843.

- 394 7. Billaud T, Brun C, Ancelin K, Koering CE, Laroche T, Gilson E. 1997. Telomeric  
395 localization of TRF2, a novel human telobox protein. *Nat Genet* 17:236–9.
- 396 8. Bianchi A, Smith S, Chong L, Elias P, de Lange T. 1997. TRF1 is a dimer and  
397 bends telomeric DNA. *EMBO J* 16:1785–1794.
- 398 9. Broccoli D, Smogorzewska A, Chong L, de Lange T. 1997. Human telomeres  
399 contain two distinct Myb-related proteins, TRF1 and TRF2. *Nat Genet* 17:231–  
400 235.
- 401 10. Baumann P, Cech TR. 2001. Pot1, the Putative Telomere End-Binding Protein in  
402 Fission Yeast and Humans. *Science* (80- ) 292:1171–1175.
- 403 11. Baumann P, Podell E, Cech TR. 2002. Human Pot1 (protection of telomeres)  
404 protein: cytolocalization, gene structure, and alternative splicing. *Mol Cell Biol*  
405 22:8079–87.
- 406 12. Kim SH, Kaminker P, Campisi J. 1999. TIN2, a new regulator of telomere length  
407 in human cells. *Nat Genet* 23:405–412.
- 408 13. Houghtaling BR, Cuttonaro L, Chang W, Smith S. 2004. A dynamic molecular  
409 link between the telomere length regulator TRF1 and the chromosome end  
410 protector TRF2. *Curr Biol* 14:1621–1631.
- 411 14. Ye JZ, Hockemeyer D, Krutchinsky AN, Loayza D, Hooper SM, Chait BT, de  
412 Lange T. 2004. POT1-interacting protein PIP1: a telomere length regulator that  
413 recruits POT1 to the TIN2/TRF1 complex. *Genes Dev* 18:1649–1654.
- 414 15. Liu D, Safari A, O’Connor MS, Chan DW, Laegeler A, Qin J, Songyang Z. 2004.  
415 PTOP interacts with POT1 and regulates its localization to telomeres. *Nat Cell*

- 416 Biol 6:673–680.
- 417 16. Li B, Oestreich S, de Lange T. 2000. Identification of human Rap1: implications  
418 for telomere evolution. *Cell* 101:471–483.
- 419 17. Lei M, Zaug AJ, Podell ER, Cech TR. 2005. Switching human telomerase on and  
420 off with hPOT1 protein in vitro. *J Biol Chem* 280:20449–20456.
- 421 18. Wang F, Podell ER, Zaug AJ, Yang Y, Baciu P, Cech TR, Lei M. 2007. The  
422 POT1-TPP1 telomere complex is a telomerase processivity factor. *Nature*  
423 445:506–10.
- 424 19. Latrick CM, Cech TR. 2010. POT1-TPP1 enhances telomerase processivity by  
425 slowing primer dissociation and aiding translocation. *EMBO J* 29:924–33.
- 426 20. Nandakumar J, Bell CF, Weidenfeld I, Zaug AJ, Leinwand LA, Cech TR. 2012.  
427 The TEL patch of telomere protein TPP1 mediates telomerase recruitment and  
428 processivity. *Nature* 492:285–289.
- 429 21. Sexton AN, Youmans DT, Collins K. 2012. Specificity requirements for human  
430 telomere protein interaction with telomerase holoenzyme. *J Biol Chem*  
431 287:34455–34464.
- 432 22. Zhong FL, Batista LFZ, Freund A, Pech MF, Venteicher AS, Artandi SE. 2012.  
433 TPP1 OB-fold domain controls telomere maintenance by recruiting telomerase to  
434 chromosome ends. *Cell* 150:481–494.
- 435 23. Grill S, Tesmer VM, Nandakumar J. 2018. The N Terminus of the OB Domain of  
436 Telomere Protein TPP1 Is Critical for Telomerase Action. *Cell Rep* 22:1132–1140.
- 437 24. Schmidt JC, Dalby AB, Cech TR. 2014. Identification of human TERT elements

- 438 necessary for telomerase recruitment to telomeres. *Elife* 3:1–20.
- 439 25. Frescas D, de Lange T. 2014. TRF2-tethered TIN2 can mediate telomere  
440 protection by TPP1/POT1. *Mol Cell Biol* 34:1349–1362.
- 441 26. Takai KK, Kibe T, Donigian JR, Frescas D, de Lange T. 2011. Telomere  
442 protection by TPP1/POT1 requires tethering to TIN2. *Mol Cell* 44:647–659.
- 443 27. Abreu E, Aritonovska E, Reichenbach P, Cristofari G, Culp B, Terns RM, Lingner  
444 J, Terns MP. 2010. TIN2-tethered TPP1 recruits human telomerase to telomeres in  
445 vivo. *Mol Cell Biol* 30:2971–2982.
- 446 28. Frescas D, De Lange T. 2014. Binding of TPP1 protein to TIN2 protein is required  
447 for POT1a,b protein-mediated telomere protection. *J Biol Chem* 289:24180–  
448 24187.
- 449 29. Ye JZ, Donigian JR, van Overbeek M, Loayza D, Luo Y, Krutchinsky AN, Chait  
450 BT, de Lange T. 2004. TIN2 binds TRF1 and TRF2 simultaneously and stabilizes  
451 the TRF2 complex on telomeres. *J Biol Chem* 279:47264–47271.
- 452 30. Kim H, Li F, He Q, Deng T, Xu J, Jin F, Coarfa C, Putluri N, Liu D, Songyang Z.  
453 2017. Systematic analysis of human telomeric dysfunction using inducible  
454 telosome/shelterin CRISPR/Cas9 knockout cells. *Cell Discov* 3:17034.
- 455 31. O’Connor MS, Safari A, Xin H, Liu D, Songyang Z. 2006. A critical role for TPP1  
456 and TIN2 interaction in high-order telomeric complex assembly. *Proc Natl Acad  
457 Sci U S A* 103:11874–11879.
- 458 32. Liu D, O’Connor MS, Qin J, Songyang Z. 2004. Telosome, a mammalian  
459 telomere-associated complex formed by multiple telomeric proteins. *J Biol Chem*

- 460 279:51338–51342.
- 461 33. Lim CJ, Zaug AJ, Kim HJ, Cech TR. 2017. Reconstitution of human shelterin  
462 complexes reveals unexpected stoichiometry and dual pathways to enhance  
463 telomerase processivity. *Nat Commun* 8:1075.
- 464 34. Savage SA, Giri N, Baerlocher GM, Orr N, Lansdorp PM, Alter BP. 2008. TINF2,  
465 a component of the shelterin telomere protection complex, is mutated in  
466 dyskeratosis congenita. *Am J Hum Genet* 82:501–509.
- 467 35. Walne AJ, Vulliamy T, Beswick R, Kirwan M, Dokal I. 2008. TINF2 mutations  
468 result in very short telomeres: analysis of a large cohort of patients with  
469 dyskeratosis congenita and related bone marrow failure syndromes. *Blood*  
470 112:3594–3600.
- 471 36. Fukuhara A, Tanino Y, Ishii T, Inokoshi Y, Saito K, Fukuhara N, Sato S, Saito J,  
472 Ishida T, Yamaguchi H, Munakata M. 2013. Pulmonary fibrosis in dyskeratosis  
473 congenita with TINF2 gene mutation. *Eur Respir J* 42:1757–9.
- 474 37. Alder JK, Stanley SE, Wagner CL, Hamilton M, Hanumanthu VS, Armanios M.  
475 2015. Exome sequencing identifies mutant TINF2 in a family with pulmonary  
476 fibrosis. *Chest* 147:1361–1368.
- 477 38. Hoffman TW, van der Vis JJ, van Oosterhout MFM, van Es HW, van Kessel DA,  
478 Grutters JC, van Moorsel CHM. 2016. TINF2 Gene Mutation in a Patient with  
479 Pulmonary Fibrosis. *Case Rep Pulmonol* 2016:1310862.
- 480 39. Sasa GS, Ribes-Zamora A, Nelson ND, Bertuch AA. 2012. Three novel truncating  
481 TINF2 mutations causing severe dyskeratosis congenita in early childhood. *Clin*

- 482 Genet 81:470–478.
- 483 40. Guo Y, Kartawinata M, Li J, Pickett HA, Teo J, Kilo T, Barbaro PM, Keating B,  
484 Chen Y, Tian L, Al-Odaib A, Reddel RR, Christodoulou J, Xu X, Hakonarson H,  
485 Bryan TM. 2014. Inherited bone marrow failure associated with germline mutation  
486 of ACD, the gene encoding telomere protein TPP1. *Blood* 124:2767–74.
- 487 41. Kocak H, Ballew BJ, Bisht K, Eggebeen R, Hicks BD, Suman S, O’Neil A, Giri N,  
488 Maillard I, Alter BP, Keegan CE, Nandakumar J, Savage SA, Bass S, Boland J,  
489 Burdett L, Chowdhury S, Cullen M, Dagnall C, Higson H, Hutchinson AA, Jones  
490 K, Larson S, Lashley K, Lee HJ, Luo W, Malasky M, Manning M, Mitchell J,  
491 Roberson D, Vogt A, Wang M, Yeager M, Zhang X, Caporaso NE, Chanock SJ,  
492 Greene MH, Goldin LR, Goldstein AM, Hildesheim A, Hu N, Landi MT, Loud J,  
493 Mai PL, McMaster ML, Mirabello L, Morton L, Parry D, Pathak A, Rotunno M,  
494 Stewart DR, Taylor P, Tobias GS, Tucker MA, Wong J, Yang XR, Yu G, Maillard  
495 I, Alter BP, Keegan CE, Nandakumar J, Savage SA. 2014. Hoyeraal-Hreidarsson  
496 syndrome caused by a germline mutation in the TEL patch of the telomere protein  
497 TPP1. *Genes Dev* 28:2090–102.
- 498 42. Bisht K, Smith EM, Tesmer VM, Nandakumar J. 2016. Structural and functional  
499 consequences of a disease mutation in the telomere protein TPP1. *Proc Natl Acad*  
500 *Sci U S A* 201605685.
- 501 43. Takai H, Jenkinson E, Kabir S, Babul-Hirji R, Najm-Tehrani N, Chitayat DA,  
502 Crow YJ, de Lange T. 2016. A POT1 mutation implicates defective telomere end  
503 fill-in and telomere truncations in Coats plus. *Genes Dev* 30:812–826.



- 504 44. Yang D, He Q, Kim H, Ma W, Songyang Z. 2011. TIN2 protein dyskeratosis  
505 congenita missense mutants are defective in association with telomerase. *J Biol*  
506 *Chem* 286:23022–23030.
- 507 45. Frank AK, Tran DC, Qu RW, Stohr BA, Segal DJ, Xu L. 2015. The Shelterin  
508 TIN2 Subunit Mediates Recruitment of Telomerase to Telomeres. *PLoS Genet*  
509 11:1–19.
- 510 46. Frescas D, de Lange T. 2014. A TIN2 dyskeratosis congenita mutation causes  
511 telomerase-independent telomere shortening in mice. *Genes Dev* 28:153–166.
- 512 47. Canudas S, Houghtaling BR, Bhanot M, Sasa G, Savage SA, Bertuch AA, Smith  
513 S. 2011. A role for heterochromatin protein 1gamma at human telomeres. *Genes*  
514 *Dev* 25:1807–1819.
- 515 48. Kaminker PG, Kim SH, Desprez PY, Campisi J. 2009. A novel form of the  
516 telomere-associated protein TIN2 localizes to the nuclear matrix. *Cell Cycle*  
517 8:931–939.
- 518 49. Nelson ND, Dodson LM, Escudero L, Sukumar AT, Williams CL, Mihalek I,  
519 Baldan A, Baird DM, Bertuch AA. 2018. The C-terminal extension unique to the  
520 long isoform of the shelterin component TIN2 enhances its interaction with TRF2  
521 in a phosphorylation- and dyskeratosis congenita-cluster-dependent fashion. *Mol*  
522 *Cell Biol* MCB.00025-18.
- 523 50. Ishdorj G, Kost SEF, Beiggi S, Zang Y, Gibson SB, Johnston JB. 2017. A novel  
524 spliced variant of the TIN2 shelterin is present in chronic lymphocytic leukemia.  
525 *Leuk Res* 59:66–74.

- 526 51. Kim SH, Parrinello S, Kim J, Campisi J. 2003. Mus musculus and Mus spretus  
527 homologues of the human telomere-associated protein TIN2. Genomics 81:422–  
528 432.
- 529 52. Michel AM, Fox G, M. Kiran A, De Bo C, O’Connor PBF, Heaphy SM, Mullan  
530 JPA, Donohue CA, Higgins DG, Baranov P V. 2014. GWIPS-viz: Development of  
531 a ribo-seq genome browser. Nucleic Acids Res 42:D859–D864.
- 532 53. Zaug AJ, Podell ER, Nandakumar J, Cech TR. 2010. Functional interaction  
533 between telomere protein TPP1 and telomerase. Genes Dev 24:613–22.
- 534 54. Cristofari GG, Lingner J. 2006. Telomere length homeostasis requires that  
535 telomerase levels are limiting. EMBO J 25:565–574.
- 536 55. Xin ZT, Ly H. 2012. Characterization of interactions between naturally mutated  
537 forms of the TIN2 protein and its known protein partners of the shelterin complex.  
538 Clin Genet 81:301–302.
- 539 56. Kim SH, Beausejour C, Davalos AR, Kaminker P, Heo SJ, Campisi J. 2004. TIN2  
540 mediates functions of TRF2 at human telomeres. J Biol Chem 279:43799–43804.
- 541 57. Bhanot M, Smith S. 2012. TIN2 stability is regulated by the E3 ligase Siah2. Mol  
542 Cell Biol 32:376–384.
- 543 58. Yang S, Counter CM. 2013. Cell cycle regulated phosphorylation of the telomere-  
544 associated protein TIN2. PLoS One 8:e71697.
- 545 59. Hu C, Rai R, Huang C, Broton C, Long J, Xu Y, Xue J, Lei M, Chang S, Chen Y.  
546 2017. Structural and functional analyses of the mammalian TIN2-TPP1-TRF2  
547 telomeric complex. Cell Res 27:1485–1502.

- 548 60. Chen Y, Yang Y, van Overbeek M, Donigian JR, Baciu P, de Lange T, Lei M.  
549 2008. A shared docking motif in TRF1 and TRF2 used for differential recruitment  
550 of telomeric proteins. *Science* (80- ) 319:1092–1096.
- 551 61. Jiang J, Chan H, Cash DD, Miracco EJ, Ogorzalek Loo RR, Upton HE, Cascio D,  
552 O'Brien Johnson R, Collins K, Loo JA, Zhou ZH, Feigon J. 2015. Structure of  
553 Tetrahymena telomerase reveals previously unknown subunits, functions, and  
554 interactions. *Science* (80- ) 350.
- 555 62. Upton HE, Chan H, Feigon J, Collins K. 2017. Shared Subunits of Tetrahymena  
556 Telomerase Holoenzyme and Replication Protein A Have Different Functions in  
557 Different Cellular Complexes. *J Biol Chem* 292:217–228.
- 558 63. Greider CW. 2016. Regulating telomere length from the inside out: the replication  
559 fork model. *Genes Dev* 30:1483–91.
- 560 64. Chen L, Redon S, Lingner J. 2012. The human CST complex is a terminator of  
561 telomerase activity. *Nature* 488:540–544.
- 562 65. Feng X, Hsu SJ, Kasbek C, Chaiken M, Price CM. 2017. CTC1-mediated C-strand  
563 fill-in is an essential step in telomere length maintenance. *Nucleic Acids Res*  
564 45:4281–4293.
- 565 66. Zimmermann M, Kibe T, Kabir S, de Lange T. 2014. TRF1 negotiates TTAGGG  
566 repeat-associated replication problems by recruiting the BLM helicase and the  
567 TPP1/POT1 repressor of ATR signaling. *Genes Dev* 28:2477–91.
- 568 67. Wan M, Qin J, Songyang Z, Liu D. 2009. OB fold-containing protein 1 (OBFC1),  
569 a human homolog of yeast Stn1, associates with TPP1 and is implicated in

- 570 telomere length regulation. *J Biol Chem* 284:26725–26731.
- 571 68. Wu P, Takai H, de Lange T. 2012. Telomeric 3' overhangs derive from resection  
572 by Exo1 and Apollo and fill-in by POT1b-associated CST. *Cell* 150:39–52.
- 573 69. Pinzaru AM, Hom RA, Beal A, Phillips AF, Ni E, Cardozo T, Nair N, Choi J,  
574 Wuttke DS, Sfeir A, Denchi EL. 2016. Telomere Replication Stress Induced by  
575 POT1 Inactivation Accelerates Tumorigenesis. *Cell Rep* 15:2170–2184.
- 576 70. Counter CM, Hahn WC, Wei W, Caddle SD, Beijersbergen RL, Lansdorp PM,  
577 Sedivy JM, Weinberg RA. 1998. Dissociation among in vitro telomerase activity,  
578 telomere maintenance, and cellular immortalization. *Proc Natl Acad Sci*  
579 95:14723–8.
- 580 71. Armbruster BN, Banik SS, Guo C, Smith AC, Counter CM. 2001. N-terminal  
581 domains of the human telomerase catalytic subunit required for enzyme activity in  
582 vivo. *Mol Cell Biol* 21:7775–86.
- 583 72. Chiba K, Vogan JM, Wu RA, Gill MS, Zhang X, Collins K, Hockemeyer D. 2016.  
584 Endogenous TERT N-terminal tagging affects human telomerase function at  
585 telomeres in vivo. *Mol Cell Biol* 37:MCB.00541-16.
- 586 73. Simossis VA, Heringa J. 2003. The PRALINE online server: Optimising  
587 progressive multiple alignment on the web. *Comput Biol Chem* 27:511–519.
- 588 74. Simossis VA, Heringa J. 2005. PRALINE: A multiple sequence alignment toolbox  
589 that integrates homology-extended and secondary structure information. *Nucleic*  
590 *Acids Res* 33:W289–W294.
- 591 75. Pertea M, Pertea GM, Antonescu CM, Chang T-C, Mendell JT, Salzberg SL. 2015.

- 592 StringTie enables improved reconstruction of a transcriptome from RNA-seq  
593 reads. *Nat Biotechnol* 33:290–295.
- 594 76. Kim D, Langmead B, Salzberg SL. 2015. HISAT: a fast spliced aligner with low  
595 memory requirements. *Nat Methods* 12:357–360.
- 596 77. Thorvaldsdóttir H, Robinson JT, Mesirov JP. 2013. Integrative Genomics Viewer  
597 (IGV): High-performance genomics data visualization and exploration. *Brief*  
598 *Bioinform* 14:178–192.
- 599 78. Robinson JT, Thorvaldsdóttir H, Winckler W, Guttman M, Lander ES, Getz G,  
600 Mesirov JP. 2011. Integrative genomics viewer. *Nat Biotechnol* 29:24–26.
- 601 79. Wang S, Pike AM, Lee SS, Strong MA, Connelly CJ, Greider CW. 2017. BRD4  
602 inhibitors block telomere elongation. *Nucleic Acids Res* 45:8403–8410.
- 603 80. Morrish TA, Greider CW. 2009. Short telomeres initiate telomere recombination  
604 in primary and tumor cells. *PLoS Genet* 5.

605

## 606 **Acknowledgements**

607 We would like to thank Drs. Jonathan Alder, Deborah Wuttke, Sarah Wheelan  
608 and Leslie Glustrom for suggestions and help with experiments; Dr. Mary Armanios for  
609 human LCL cell lines; and Dr. Andrew Holland for FLP-in cell lines. We thank Jonathan  
610 Alder, Valerie Gaysinskaya, and Deborah Wuttke for critical reading of the manuscript.  
611 This work was supported by NIH Grants R37AG009383 and R35CA209974 and to  
612 C.W.G. and a Turock Scholar award to A.M.P.

613 **Author Contributions**

614 A.M.P and C.W.G designed the project and wrote the manuscript. A.M.P.  
615 performed all cloning, cell line generation, telomerase assays, and data analysis. M.A.S.  
616 performed immunofluorescence and q-FISH and passaged cell lines. J.P.O and A.M.P.  
617 performed 3'RACE and PacBio sequencing. C.J.C. prepared genomic DNA and  
618 performed Southern Blots.  
619

620 **Competing Interests**

621 The authors declare they have no competing interests.

622

## 623 **Materials and Methods**

### 624 **Cell Culture**

625 Cell lines were cultured in the indicated media supplemented with 10% heat-  
626 inactivated FBS (Invitrogen, 16140071) and 1% penicillin/streptomycin/glutamine (PSG,  
627 Invitrogen 10378016). HeLa, HeLa TREx FLP-in, 293T, and 293TREx FLP-in cells  
628 were cultured in DMEM (Gibco); hTERT-RPE1 cells were cultured in DMEM/F12  
629 (Corning); lymphoblastoid cell lines (LCLs) derived from healthy controls (samples  
630 obtained after written informed consent and approval from Johns Hopkins Medicine  
631 Institutional Review Board) were cultured in RPMI (Gibco); and K562 cell lines were  
632 cultured in IMDM (Gibco).

### 633 **Expression Constructs**

634 TIN2S cDNA was purchased from Invitrogen (Ultimate ORF IOH80607) in  
635 pENTR221. A synthetic gBlock (IDT) containing the downstream TIN2 sequence was  
636 used in Gibson Assembly to generate TIN2L. TIN2M was cloned from RT-PCR of  
637 endogenous transcripts. TIN2S, M, and L were amplified with primers containing  
638 HindIII and NotI restriction sites and an N-terminal myc tag and cloned into  
639 pcDNA5/FRT. *TINF2*, the TIN2 full-length gene inclusive of introns, was cloned into  
640 pcDNA5/FRT as described in(37). Patient mutations were generated by Site-Directed  
641 Mutagenesis. All constructs and mutants were sequence verified by Sanger sequencing at  
642 the JHU Synthesis & Sequencing Facility.

643 P3x-Flag-POT1-cDNA6/Myc-HisC, p3x-Flag-TPP1<sub>87-544</sub>-cDNA6/Myc-HisC,  
644 p3x-Flag-TERT-cDNA6/Myc-HisC were a kind gift from the Cech lab(20). We  
645 introduced E169A/E171A mutations with site-directed mutagenesis to create TPP1<sup>TEL</sup>.  
646 TPP1 or TPP1<sup>TEL</sup>, POT1, and TERT were assembled into a single expression cassette  
647 connected by 2A peptides (Supplementary Figure 3) TERT alone was also cloned into  
648 pcDNA5. The 2A peptides leave a small tag on the downstream proteins, so TERT was  
649 cloned in the last position because it is nonfunctional with C-terminal tags(70–72).  
650 Expression cassettes are flanked by BstBI and NotI restriction sites.

### 651 **Multiple Sequence Alignments**

652 TIN2 sequences from vertebrates with known or predicted TIN2 proteins were obtained  
653 from NCBI. The longer isoform was chosen for organisms with multiple reported  
654 isoforms. Sequences were uploaded to PRALINE multiple sequence alignment using the  
655 default parameters(73, 74). To make the sequence conservation heat map, PRALINE  
656 output was imported into Microsoft Excel, and the alignment scores (0-10) of human  
657 TIN2 were colored from white=0, not conserved to navy=8-10, highly conserved.  
658 Sequences used are listed in Supplementary Table 1.

### 659 **CRISPR editing**

660 Guide RNAs were selected using the Zhang Lab CRISPR design tool  
661 (<http://crispr.mit.edu/>). For endogenous tagging of TIN2, the guide  
662 cgccaccagggcgtagccaTGG was cloned into pX459-U6- Chimeric\_BB-CBh-hSpCas9-  
663 2A-Puro. The repair template was generated by PCR from the cloned myc-*TINF2*  
664 construct (Supplementary Figure 1). 1µg of Cas9-2A-Puro+TIN2 guide was transfected



665 into 293T cells with 10 molar equivalents of the repair template using XtremeGENE9  
666 (Roche, 6365787001). Editing was enriched with puromycin, cloned by limiting dilution,  
667 and screened by PCR and restriction digest. Positive clones were examined by western  
668 blot. While we found many edited clones, 293T cells are hypotriploid with an unstable  
669 karyotype, and we observed high endogenous Myc expression that interfered with  
670 western blotting for myc-tagged TIN2 (Supplementary Figure 1). These caveats make it  
671 difficult to further study TIN2 in these knock-in cell lines.

### 672 **3'RACE and PacBio**

673 The 3'RACE and sequencing was performed using samples from five human cell  
674 lines (293T, HeLa, RPE-1, K562, LCL) and two mouse samples (CAST/EiJ MEFs,  
675 C57BL/6 liver). All mouse samples were obtained under approval by the Institutional  
676 Animal Care and Use Committee at the Johns Hopkins University School of Medicine.  
677 We combined 3'RACE with Pacific Biosciences (PacBio) Single-Molecule, Real-Time  
678 (SMRT) sequencing to cover transcripts from the 5'UTR through the polyA tail. First, we  
679 isolated mRNA  $>10^6$  cells using the RNeasy Kit (Qiagen, 74104) per manufacturer  
680 instructions, QIAshredder spin columns (Qiagen, 79654), on-column DNase digestion  
681 (Qiagen, 79254) to remove any genomic DNA, and an RNA clean-up. Then we reverse  
682 transcribed 1.5  $\mu$ g mRNA with an oligo-dT<sub>20</sub> primer with an adapter sequence  
683 (GACTCGAGTCGACATCG-T<sub>20</sub>) using the SuperScript III First Strand Synthesis Kit  
684 (Qiagen, 18080-051). 5  $\mu$ l of the resulting cDNA was amplified with Hot Start Phusion  
685 Polymerase (Thermo, F-549L) using primers to the adapter and the 5'-UTR  
686 (CGGCGACGTTTAAAGCTGA). 3-5 replicate PCR reactions were combined, purified

687 with the QIAquick PCR Purification Kit (QIAGEN, 28104), and submitted to the Johns  
688 Hopkins Deep Sequencing & Microarray Core Facility for sequencing. Quality control  
689 was performed on a 1:200 dilution of samples using a Bioanalyzer (Agilent, G2939A)  
690 High Sensitivity DNA Assay. Products were size selected for the expected size range of  
691 1-3kb. 1 SMRT cell was sequenced per sample. Sequencing reads were processed in the  
692 SMRT Analysis v4.0 software, aligned to chromosome 14 with HISAT2 and assembled  
693 into potential transcripts using StringTie(75, 76). StringTie was first run for individual  
694 samples using the default settings except the minimum isoform fraction was set to 0.01  
695 instead of 0.1. To build a gene model for all human reads, StringTie --merge was run  
696 with the minimum isoform fraction set to 0.05. HISAT2 and StringTie results were  
697 viewed in IGV(77, 78).

#### 698 **Western Blotting**

699 Cells were lysed on ice in CHAPS lysis buffer (10 mM Tris-HCl, 1 mM MgCl<sub>2</sub>, 1  
700 mM EGTA, pH 8.0, 0.1 mM Benzamidine, 5 mM β-Mercaptoethanol (BME), 0.5%  
701 CHAPS, 10% Glycerol, pH 7.5) and clarified by centrifugation. Samples were denatured  
702 with 1X LDS (Invitrogen, NP0008) with 50 mM DTT and heated at 65°C for 10 minutes  
703 and separated on a 4-12% Bis-Tris gel (NuPAGE, NP0323) in 1X MOPS buffer  
704 (Invitrogen, NP0001) with 3 μl of SeeBlue Plus2 (Thermo, LC5925) prestained ladder to  
705 estimate molecular weight. Proteins were transferred to PVDF, blocked in 1X TBS +  
706 0.1% Tween20 (TBST), 5% milk (Bio-Rad 170-6404), probed with the indicated  
707 antibodies, and developed by chemiluminescence with an ImageQuant LAS4000 imager  
708 (GE Healthcare). Primary antibodies and concentrations are as follows: mouse anti-myc

709 4A6 (Millipore 05-24), 1:2000; mouse anti-FLAG M2 (Sigma F1804), 1:5000; rabbit  
710 anti-tubulin (Abcam, ab6046), 1:5000. Secondary antibodies were anti-mouse IgG or  
711 anti-rabbit IgG conjugated to HRP (Cell Signaling), 1:10,000.

## 712 **Co-Immunoprecipitation**

713 Immunoprecipitations were carried out using either anti-c-myc agarose (Pierce  
714 20168) or anti-FLAG M2 affinity gel (Sigma A2220). 20  $\mu$ l of bead slurry per reaction  
715 was washed with PBS and equilibrated in CHAPS buffer before adding 45  $\mu$ l lysate.  
716 Samples were incubated in an end-over-end mixer at 4°C for two hours. Beads were  
717 pelleted, washed 4 times with 300  $\mu$ l 1X CHAPS buffer, and resuspended in 2X LDS  
718 loading dye for western blot analysis.

## 719 **Telomerase Assays**

720 Telomerase assay cell lines were generated in 293 TREx FLP-in cells (Invitrogen,  
721 R78007) as described(79). Briefly, parental cells were transduced with a telomerase RNA  
722 (TR) lentivirus, selected, and cloned by limiting dilution. Then, the TPP1/POT1/TERT or  
723 TPP1<sup>TEL</sup>/POT1/TERT construct was integrated at a single site in a TR overexpressing  
724 clone using the Flp-in system (Invitrogen). For telomerase assays, 5 x 10<sup>5</sup> cells of the  
725 respective cell line were plated in each well of a 6-well dish. The next day, the indicated  
726 2.5  $\mu$ g of the indicated TIN2 or GFP construct was transfected with Lipofectamine 2000  
727 (Invitrogen, 11668019) following the manufacturer's protocol. After 48 hours, cells were  
728 lysed in 100 $\mu$ l 1X CHAPS lysis buffer and clarified by centrifugation. Telomerase assays  
729 were performed as described in(79) using 5  $\mu$ l of clarified cell lysate. Assays were

730 quantitated in ImageQuantTL (GE Healthcare) using the 15+ method as described(20).

731 Statistical analysis was performed in GraphPad Prism.

732

### 733 **TIN2 Overexpression Cell Lines**

734 HeLa FLP-in cells were seeded in 6-well plates with 3 wells per construct. The

735 next day, each well was transfected with 100 ng pcDNA5/FRT-TIN2 or -GFP construct

736 and 900 ng pOG44 (FLP-recombinase). Wells were then pooled and selected for

737 integration of the pcDNA5/FRT plasmid with hygromycin for 14 days. After selection,

738 isogenic clones (> 20 per cell line) were pooled and released from selection (“week 0”).

739 Cells were split 1:10 three times a week. No growth difference was detected. Parental

740 HeLa FLP-in cell line was validated with STR profiling through the Johns Hopkins

741 Genetic Resources Core Facility.

### 742 **Immunofluorescence**

743 HeLa FLP-in cells were plated in chamber slides. The following day, media was

744 removed, the cells were washed with PBS and fixed with 4% paraformaldehyde (PFA)

745 for 20 minutes. Slides were washed with PBS, treated with 0.5% Triton in PBS for 15

746 minutes, washed with PBS and blocked in 10% goat serum in PBS for 30 minutes

747 (Sigma, G0923). Slides were incubated with a mixture of both primary antibodies for 1

748 hour at room temperature, washed with PBS and incubated with a mixture of both

749 secondary antibodies for one hour at room temperature. After washing with PBS

750 coverslips were mounted with DAPI/Vectashield. Antibodies and dilutions are as

751 follows: mouse anti-myc clone 4A6 (Sigma, 05-724) 1:200, rabbit anti-TRF2 (Novus

752 Biologicals, NB110-57130) 1:800, goat anti-mouse IgG1-AlexaFluor 488 (Invitrogen,  
753 A21121) 1:400, and goat anti-rabbit IgG-AlexaFluor 555 (Invitrogen, A21429) 1:400.  
754 Slides were imaged on a Nikon Eclipse Ni-E microscope with a 60x objective using the  
755 NIS Elements software.

#### 756 **Telomere Southern Blots**

757 Genomic DNA was prepared from  $\sim 3\text{-}6 \times 10^6$  frozen cell pellets lysed in Nuclei  
758 Lysis Solution (Promega, A7941), treated with RNase A (10mg/ml, Roche) and  
759 overnight with Proteinase K (400mg/ml, ThermoFisher), followed by salting out of the  
760 proteins with Protein Precipitation Solution (Promega, A7951). The genomic DNA was  
761 precipitated with isopropanol and resuspended in TE (10mM Tris pH8.0, 1mM EDTA).  
762 Approximately 2 $\mu$ g of genomic DNA, quantitated by a Qubit 3.0 Fluorometer (Life  
763 Technologies), was cut with the restriction enzyme with MseI (NEB, R0525M)  
764 overnight, run on a Southern blot, and hybridized with a radiolabeled telomere fragment  
765 from JHU821 as described(79). Images were captured, converted, and quantitated from  
766 Storage Phosphor Screens (GE Healthcare) as described in(79).

#### 767 **Telomere analysis by q-FISH**

768 For metaphase Fluorescent in situ hybridization (FISH) analysis, cultures were  
769 first arrested in with Karyomax Colcemid (Invitrogen) for 6-7 h. The cells were  
770 trypsinized in 0.05% Trypsin-EDTA (Gibco), washed in PBS, swelled with 0.075M KCl  
771 at 37°C for 15 min and fixed in methanol:acetic acid (3:1). Cell suspensions were then  
772 dropped onto chilled slides and dried overnight. FISH was performed using a Cy3-  
773 labeled (CCCTAA)<sub>3</sub> PNA oligonucleotide (PE Biosystems). Metaphase spreads were

774 counterstained with DAPI/Vectashield. Slides were blinded during image acquisition and  
775 analysis. Images were acquired using a Nikon Eclipse NI-E microscope and NIS  
776 Elements software. Telomere fusions, fragile telomeres, and signal-free ends were tallied  
777 in 10-metaphases per sample in a total of three replicates. Telomere length was measured  
778 in TFL-Telo V2.0, and outliers were analyzed as described(80) to determine PQ ratios  
779 and sister-telomere ratios. Histograms of telomere lengths were generated in GraphPad  
780 Prism.

781 **Figures**

782

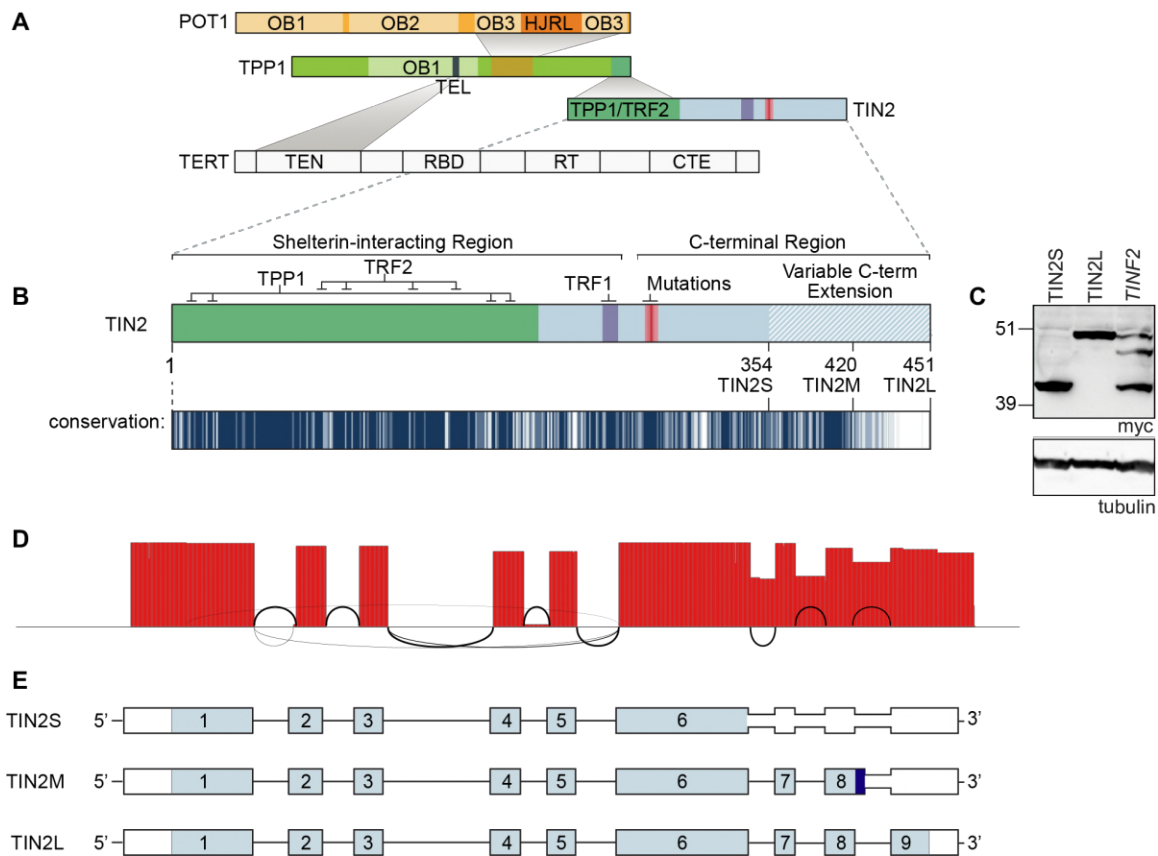

783

784 **Figure 1. TIN2 has three predominant isoforms in human cells.**

785 **a**, Schematic of TIN2, TPP1, and POT1 interaction. The TIN2 N-terminal domain  
 786 interacts with the C-terminus of TPP1, which is part of a telomerase processivity  
 787 complex. TPP1 heterodimerizes with the POT1 OB3 domain and also directly interacts  
 788 with the TERT TEN-domain through a TEL-patch motif. **b**, Detailed schematic of the  
 789 TIN2 protein. TRF2/TPP1 interaction domain is indicated in green with simplified TPP1  
 790 and TRF2 contacts illustrated above. TRF1 FxLxP interaction motif is indicated in  
 791 purple. The red gradient indicates the patient mutation cluster, where mutated residues  
 792 cluster but vary in their frequency and disease severity. Light blue hatched region  
 793 indicates the variable C-terminal extension. Below is a conservation track generated  
 794 from the values from a multiple sequence alignment with 35 known or predicted TIN2  
 795 proteins (see Methods and Supplementary Table 1); colored white = 0, not conserved to navy =  
 796 10, highly conserved. **c**, Myc western blot of overexpressed cDNA for TIN2S and TIN2L  
 797 and the full-length myc-*TINF2* gene. **d**, Sashimi plot of the 3'RACE PacBio sequencing  
 798 reads aligned to *TINF2*. Height indicates coverage and black lines indicate splicing  
 799 events, where the line weight corresponds to the frequency of usage. **e**, StringTie-  
 800 generated TIN2 transcripts from combined data from 293T, HeLa, RPE-1, K562, and  
 801 LCL cell lines showing TIN2S, TIN2L, and the new isoform, TIN2M. light blue = coding  
 802 sequence; darker blue = unique TIN2M sequence; white = untranslated region.



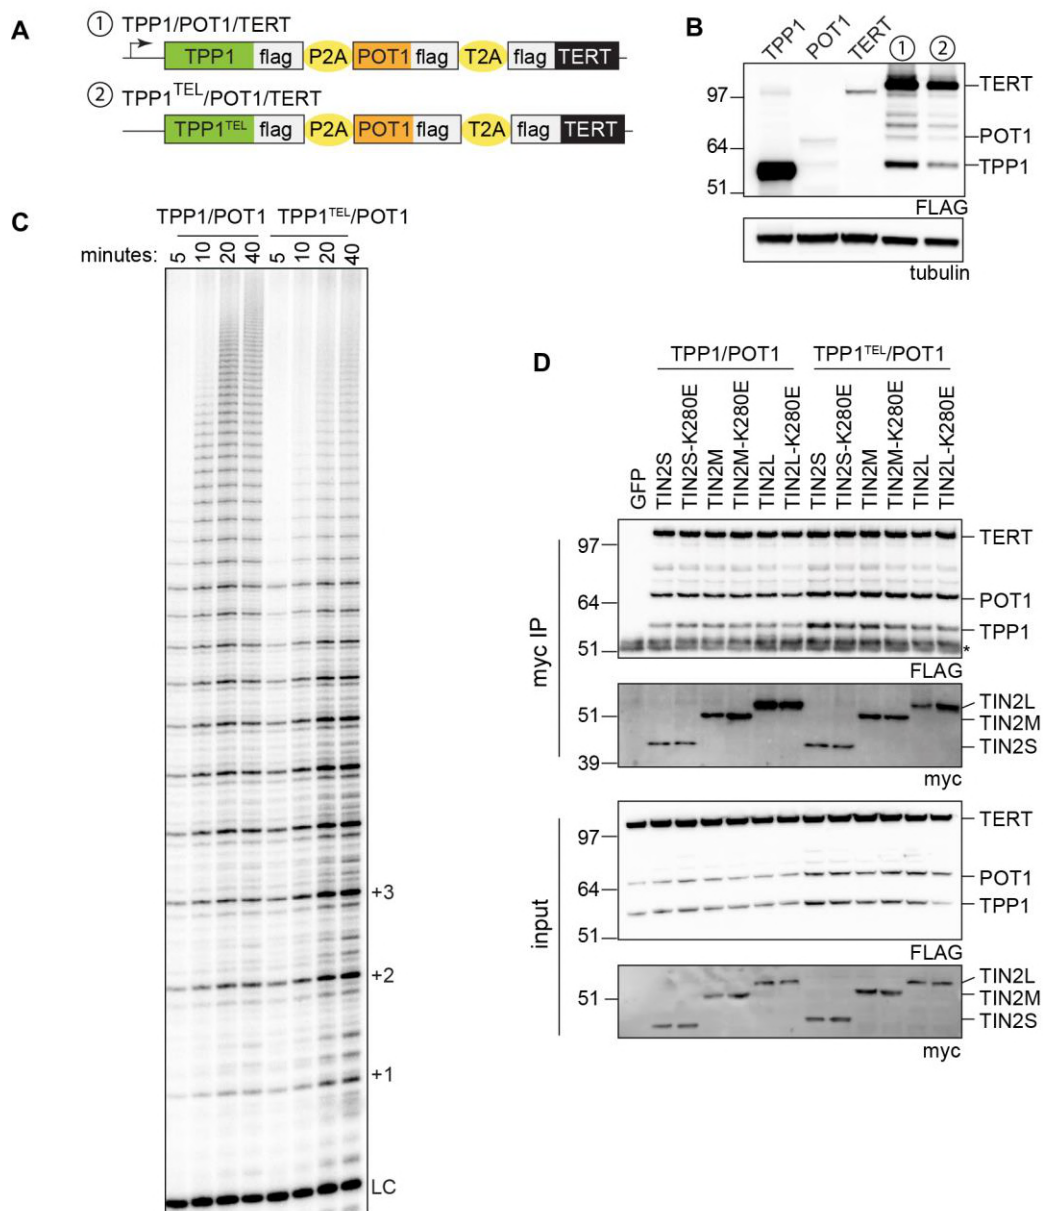

803

804 **Figure 2. TIN2 isoforms form a complex with TPP1/POT1 that binds telomerase**  
 805 **and is not disrupted by the K280E mutation.**

806 **a**, Expression cassettes used in this study. All cassettes are expressed by the CMV  
 807 promoter in the pcDNA5/FRT backbone. Telomerase assay cell lines were generated as  
 808 described in the Methods. **b**, Western blot of individually transfected TPP1, POT1, and  
 809 TERT cDNAs next to telomerase assay cell lines numbered as in **a**. FLAG bands above  
 810 POT1 are unidentified but may be TERT degradation products. **c**, Telomerase assays  
 811 stopped at 5, 10, 20, and 40 minutes for each cell line. Telomere repeats are indicated by

812 +1, +2, etc. LC = loading and purification control. **d**, Co-immunoprecipitation of TERT,  
813 TPP1, and POT1 with TIN2 using anti-myc agarose beads in both telomerase assay cell  
814 lines 1 and 2 transfected with TIN2S, TIN2M, or TIN2L. Similar co-IP levels were  
815 observed in both WT and mutant constructs. \*, IgG bands.

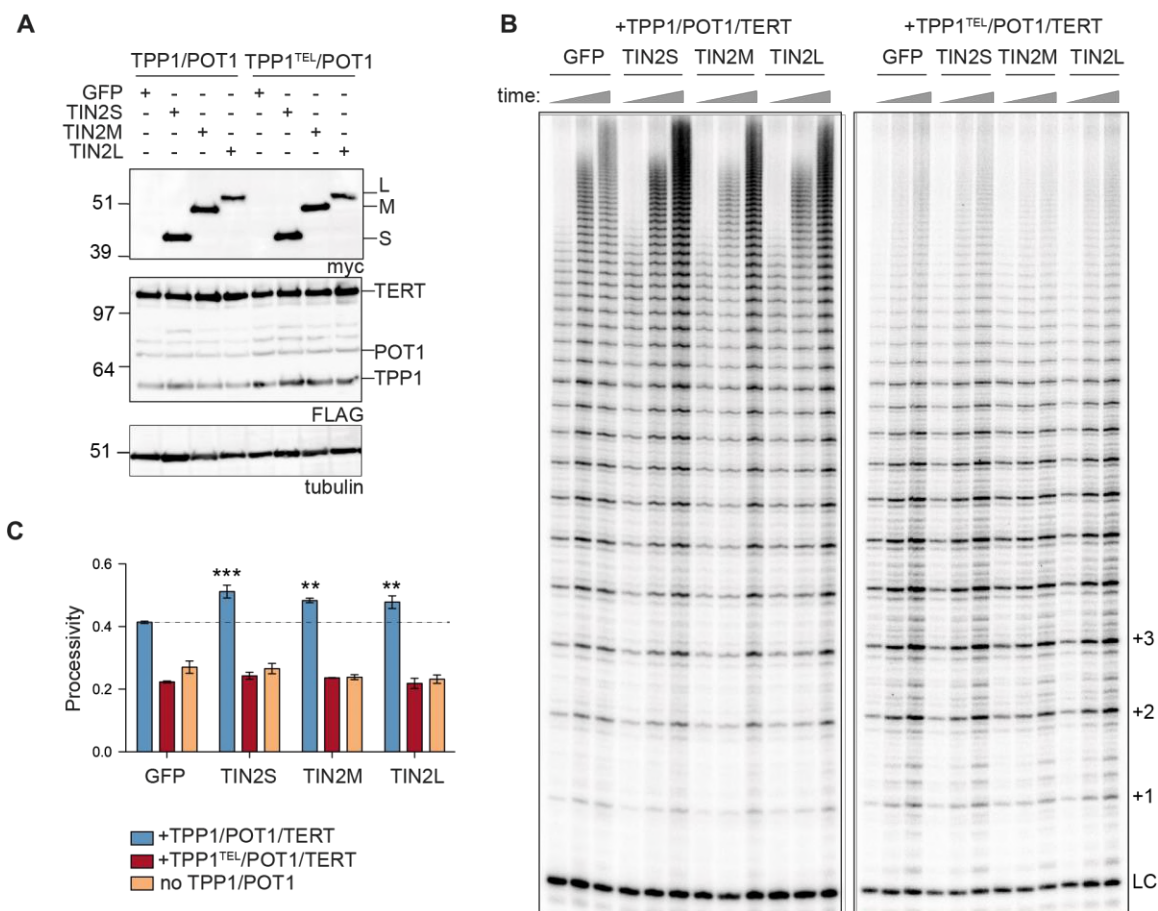

816

817 **Figure 3. TIN2 stimulates telomerase processivity beyond the TPP1/POT1**  
 818 **stimulation**

819 **a**, Western blots of GFP and myc-TIN2 isoform transfections into TPP1/POT1/TERT  
 820 (left) or TPP1<sup>TEL</sup>/POT1/TERT (right) cell lines. FLAG bands above POT1 are  
 821 unidentified but may be TERT degradation products. **b**, Telomerase assays stopped at 10,  
 822 20, and 40 minutes. Quantification is shown in (C). Increasing time indicated by the grey  
 823 triangle. LC, loading and purification control; +1, +2, +3 indicates repeat number. **c**,  
 824 Mean processivity values from 3 independent telomerase assays at the 40 minute  
 825 timepoint using the 15+ processivity method (see Methods). Orange bars are from a cell  
 826 line overexpressing TERT/TR but not TPP1/POT1 (Supplementary Figure 6). Data was  
 827 analyzed with a one-way ANOVA and Bonferroni's Multiple Comparisons test against  
 828 the GFP control. n=3 independent transfections per cell line indicated. Error bars  
 829 represent SD. \*\*, p<0.01; \*\*\*, p<0.001.

830

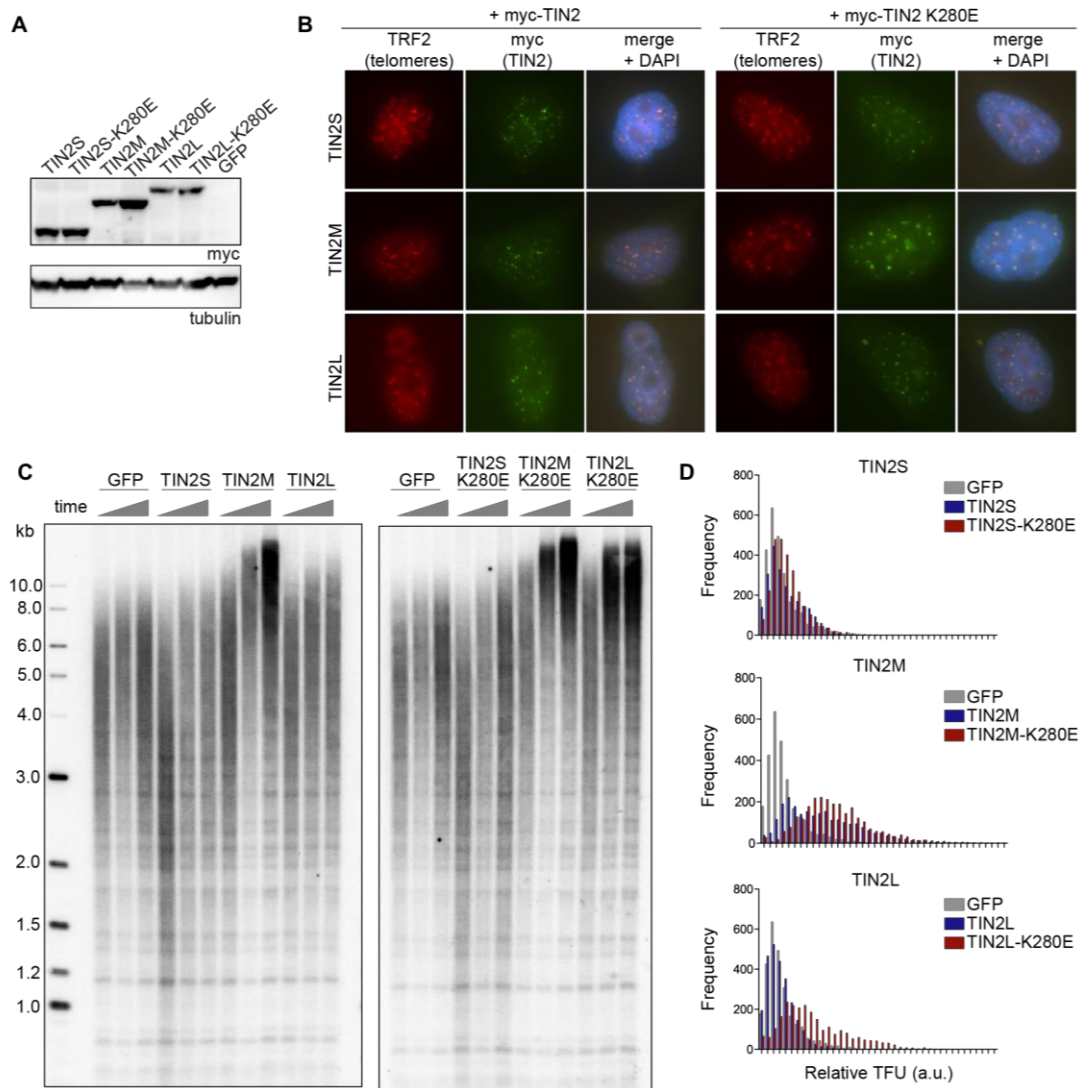

831

832 **Figure 4. TIN2 isoforms localize to telomeres but have different effects on telomere**  
 833 **length.**

834 **a**, Western blot of myc-TIN2 overexpressing HeLa FLP-in cell lines. **b**,  
 835 Immunofluorescence of TIN2 expressing cell lines. TRF2 marks telomeres (red), anti-  
 836 myc antibody marks TIN2 (green), and nuclei were counterstained with DAPI. Merge  
 837 image shows telomeric foci with colocalized TRF2 and TIN2 staining. **c**, Telomere  
 838 Southern blot of genomic DNA from HeLa-TIN2 cell lines. Three timepoints indicated  
 839 by grey triangles refer cells harvested at 3, 8, and 13 weeks in culture. Left, 2-log ladder  
 840 values in kb. **d**, Histograms of telomere intensities from quantitative telomere FISH (q-  
 841 FISH) on late passage metaphase chromosomes in the indicated cell lines, separated by

842 isoform. The same GFP sample is plotted on each graph. Relative telomere fluorescence  
843 units (TFU) on the x-axis reflects telomere length. In each, grey = GFP, blue = TIN2-  
844 WT, red = TIN2-K280E.

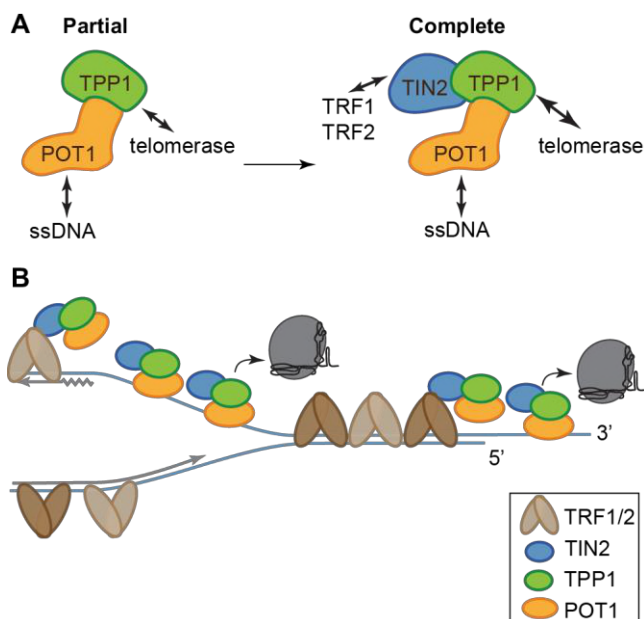

845

846 **Figure 5. TIN2/TPP1/POT1 is a stable shelterin subcomplex.**

847 **a**, TIN2 completes the telomerase processivity complex. TIN2 enhances TPP1/POT1  
848 stimulation of telomerase, forming a heterotrimeric processivity complex that is recruited  
849 to the telomere through TRF1/2 interactions. **b**, A dynamic, heterogeneous distribution of  
850 shelterin proteins across the length of human telomeres coordinates telomere length  
851 maintenance. TRF1 and TRF2 may direct TIN2/TPP1/POT1 to single-stranded DNA  
852 both at the telomere overhang and within the replication fork, aiding its roles in fork  
853 progression and telomerase stimulation.
